# Supplementary material for: Albumin-assisted exfoliated ultrathin rhenium disulfide nanosheets as a tumor targeting and dual-stimuli-responsive drug delivery system for a combination chemo-photothermal treatment
Source: PubMed Central journal article supplement — RSC Adv. 2018 Jan 25;8(9):4624–33. doi: 10.1039/c7ra13454a (PMC9077812; doi:10.1039/c7ra13454a), 2018-01-25
Supplement: RA-008-C7RA13454A-s001.pdf [file RA-008-C7RA13454A-s001.pdf]

## Supplementary information

### **Albumin-assisted exfoliated ultrathin rhenium disulfide nanosheets as a tumor targeting and dual-stimuli-responsive drug delivery system for a combination chemo-photothermal treatment†**

Qunlian Huang <sup>a</sup>, Shurong Wang <sup>a</sup>, Jie Zhou <sup>a</sup>, Xiaoyan Zhong <sup>a</sup>, and Yilan Huang <sup>a\*</sup>

<sup>a</sup> Department of Pharmacy, The Affiliated Hospital of southwest Medical University, Luzhou, Sichuan 646000, China.

\*Correspondence: Yilan Huang

E-mail: hyl\_medicine@163.com; Tel: +86-18982423710

† Electronic supplementary information (ESI) available

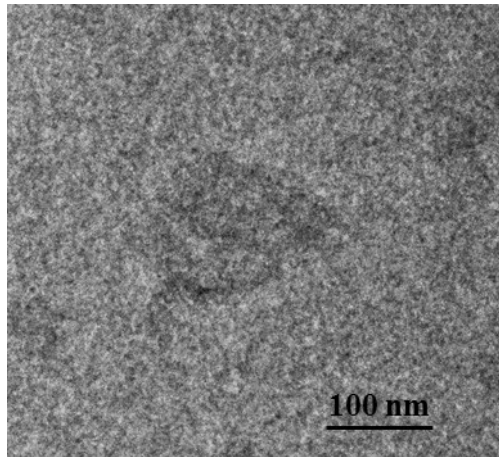

**Figure S1** The TEM image of the utReS<sub>2</sub>.

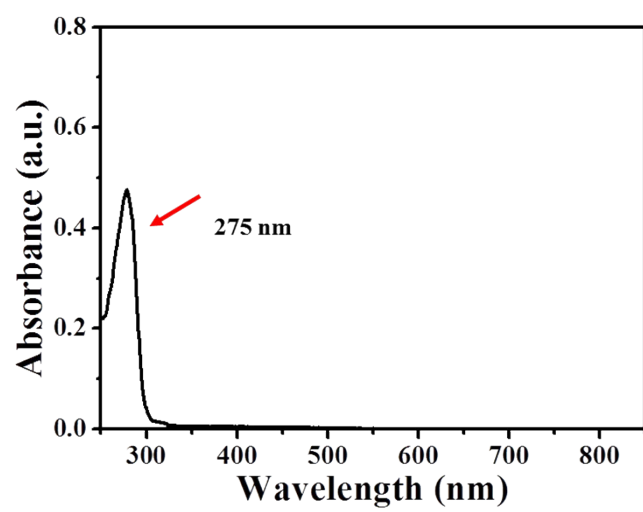

**Figure S2** The absorbance spectrum of BSA.

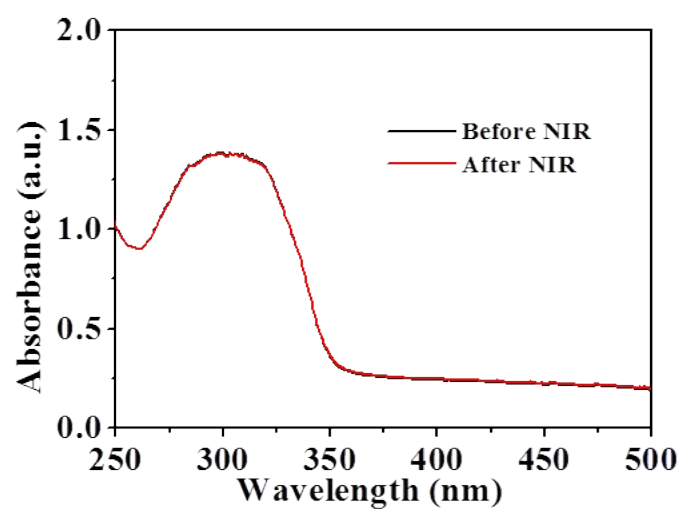

**Figure S3** UV-vis spectroscopy of utReS<sub>2</sub>@RSV-FA solution before and after the continuous irradiations of 808 nm laser for 5 cycles.

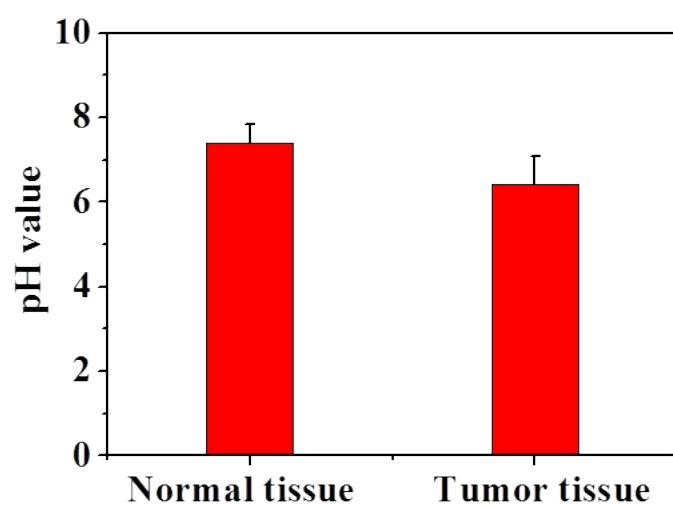

**Figure S4** The pH value of normal and inner tumor tissue

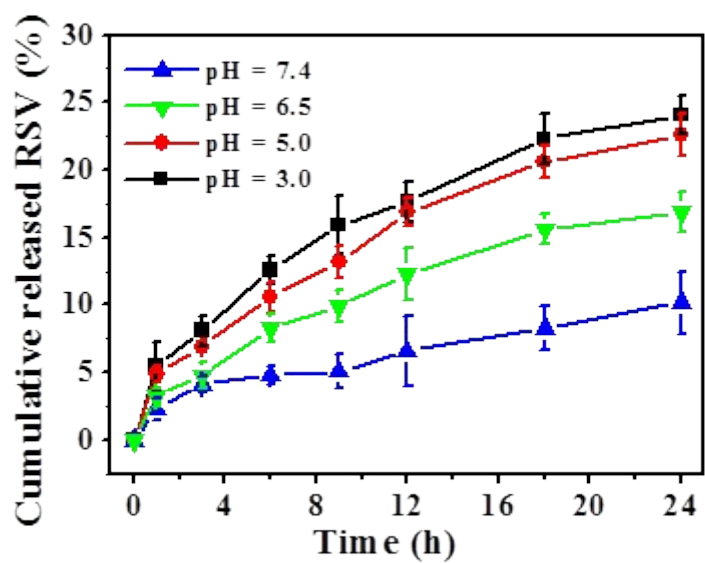

**Figure S5** Release kinetics of RSV from utReS<sub>2</sub>@RSV-FA in PBS buffer at pH = 7.4, 6.5, 5.0 and 3.0, respectively.

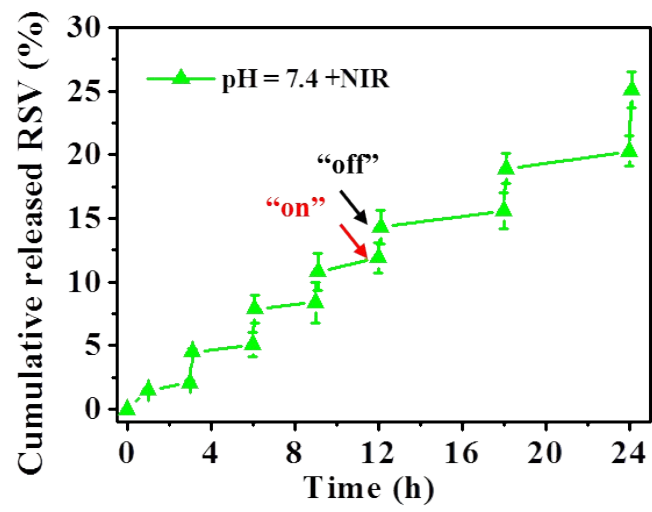

**Figure S6** Release kinetic of RSV from  $\text{utReS}_2\text{@RSV-FA}$  in PBS buffer (pH=7.4) in the presence of 808 nm NIR laser.
